# Supplementary material for: Microwave modification of iron supported on beta silicon carbide catalysts for Fischer–Tropsch synthesis
Source: Royal Society of Chemistry journal article supplement (doi:10.1039/d2re00024e), 2022-01-01
Supplement: d2re00024e1.pdf [file d2re00024e1.pdf]

## Supporting information

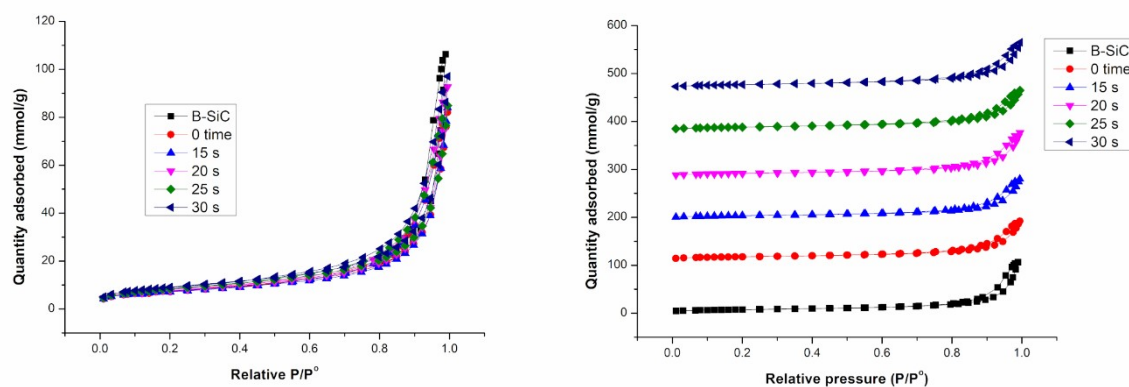

**Figure S1:** BET isotherms of the Fe catalysts

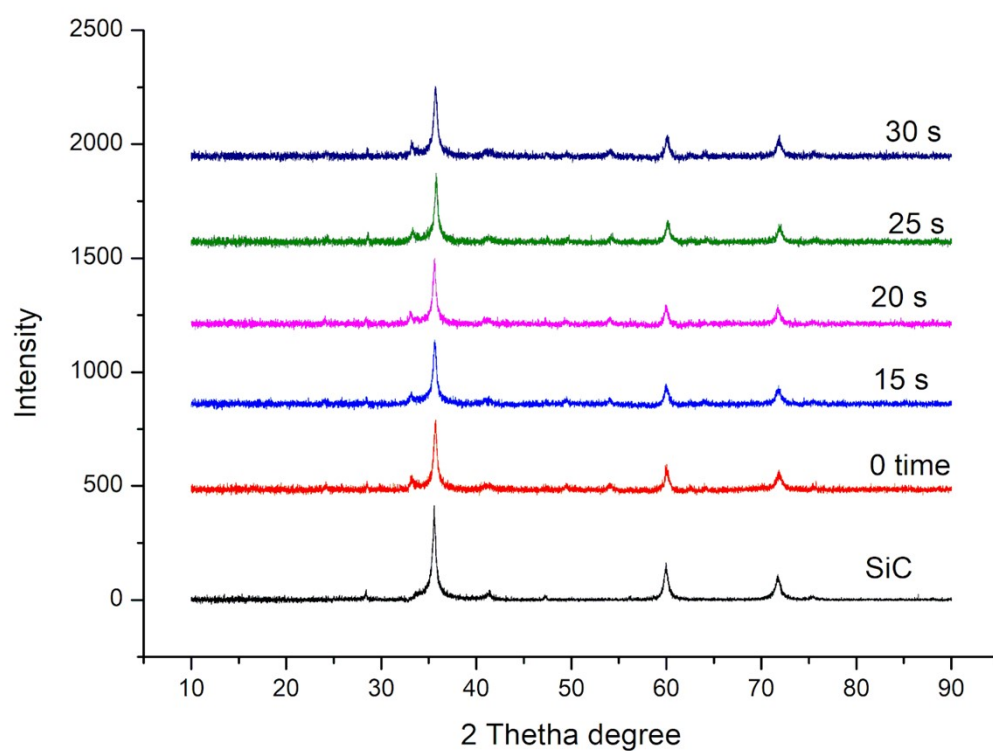

**Figure S2:** XRD of Fe catalysts

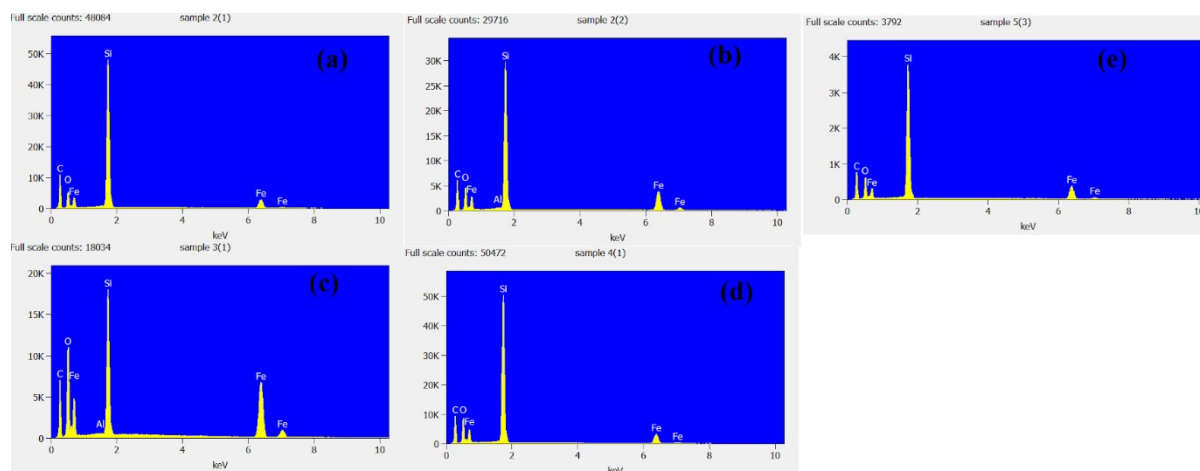

**Figure S3:** EDX of Fe catalysts. (a) Fe- $\beta$ SiC (0 time), (b) Fe- $\beta$ SiC (15 s MIR), (c) Fe- $\beta$ SiC (20 s MIR), (d) Fe- $\beta$ SiC (25 s MIR), (e) Fe- $\beta$ SiC (30 s MIR).

The CO conversions, CO reactions rates and products selectivities were calculated based on mass balance calculations reported by Lu and Muleya *et al*, and are as follow:

$$\%M (gas) = (A_{gas}/A_{cal}) \times M (Cal) \quad (1)$$

% M (gas) = Molar percentage of a gas analyzed.

$A_{gas}$  = integrated area of the GC (Gas chromatography) peak corresponding to the gas analyzed.

$A_{cal}$  = integrated area of the GC peak corresponding to the gas of interest in the calibration gas mixture.

$M (Cal)$  = Molar percentage of the gas of interest in the calibration gas mixture.

Regarding compounds that are not present in the calibration mixture, calibration of reference compound and response factors were used. The following equation was used:

$$\%M (gas) = (A_{gas}/A_{Rcal}) \times \% \alpha \times RF \quad (2)$$

$\% \alpha$  = Molar percentage of the reference compound in the calibration gas mixture.

$A_{Rcal}$  = integrated area from the GC peak of the reference compound in the calibration gas mixture.

RF = Response factor of the gas analyzed with respect to the reference compound.

$C_2H_4$  was used as a reference for olefins while  $C_2H_6$  was a reference for paraffins. The response factors of hydrocarbons are presented in Table 1 below.

**Table 1:** Response factors of hydrocarbons products (C2 as reference).

| Carbon number | Olefin | Paraffin |
|---------------|--------|----------|
| 2             | 1      | 1        |
| 3             | 0.7    | 0.74     |
| 4             | 0.55   | 0.55     |
| 5             | 0.47   | 0.47     |
| 6             | 0.4    | 0.4      |
| 7             | 0.35   | 0.35     |
| 8             | 0.32   | 0.32     |
| 9             | 0.28   | 0.28     |
| 10            | 0.24   | 0.24     |
| 11            | 0.21   | 0.21     |

|    |      |      |
|----|------|------|
| 12 | 0.19 | 0.19 |
| 13 | 0.18 | 0.18 |
| 14 | 0.17 | 0.17 |
| 15 | 0.15 | 0.15 |

In our Fischer-Tropsch (FT) experiment, Nitrogen (N<sub>2</sub>) was used as an internal standard. The N<sub>2</sub> balance in the reactor was then expressed by the equation 3 below:

$$F_{in} \times XN_{2in} = F_{out} \times XN_{2out} \quad (3)$$

$F_{in}$  = Total molar flow rate (mol/min) of the reactor feed.

$XN_{2in}$  = Molar fraction of the N<sub>2</sub> in the reactor feed.

$F_{out}$  = Total molar flow rate (mol/min) of the reactor outlet gas stream.

$XN_{2out}$  = Molar fraction of the N<sub>2</sub> in the reactor outlet gas.

The rate of CO conversion was calculated by the equation 4 as follow:

$$-r_{CO} = \frac{FCO_{in} - FCO_{out}}{mcat} \quad (4)$$

$-r_{CO}$  = rate of CO conversion (mol/min/gcat).

$FCO_{in}$  = Molar flow rate [mol/min] of CO in the reactor feed.

$FCO_{out}$  = Molar flow rate [mol/min] of CO in the reactor outlet gas.

$mcat$  = mass of the catalyst.

The CO conversion was calculated by the equation 5 below:

$$\%CO_{conv} = \frac{[X_{CO,in} - X_{CO,out} \times \left(\frac{X_{N_2,in}}{X_{N_2,out}}\right)] \times 100}{X_{CO,in}} \quad (5)$$

$X_{CO, in}$  and  $X_{CO, out}$  = Molar fraction of CO in the reactor feed and outlet gas.

$X_{N_2, in}$  and  $X_{N_2, out}$  = Molar fraction of  $N_2$  in the reactor feed and outlet.

The products selectivities were calculated using the equations (6) and (7) below:

$$Sel(\theta) = \frac{[nC]_{\theta}}{-r_{CO} \times t \times m_{cat}} \quad (6)$$

$$S_{C_5+} = 100\% - \sum_{n=1}^4 S_{C_n} \quad (7)$$

$Sel(\theta)$  = Product selectivity

$[nC]_{\theta}$  = Carbon number

$S_{C_5+}$  = C5 + product selectivity
